# Supplementary material for: Enhanced temperature stability and exceptionally high electrical contrast of selenium substituted Ge2Sb2Te5 phase change materials
Source: Royal Society of Chemistry journal article supplement (doi:10.1039/c7ra01140g), 2017-01-01
Supplement: c7ra01140g1.pdf [file c7ra01140g1.pdf]

## Enhanced Temperature Stability and exceptionally high electrical Contrast of Selenium substituted $\text{Ge}_2\text{Sb}_2\text{Te}_5$ Phase Change Materials

Christine Koch,<sup>a</sup> Anna-Lena Hansen,<sup>a</sup> Torben Dankwort,<sup>b</sup> Gerrit Schienke,<sup>a</sup> Melf Paulsen,<sup>a</sup> Dominik Meyer,<sup>c</sup> Martin Wimmer,<sup>c</sup> Matthias Wuttig,<sup>c</sup> Lorenz Kienle,<sup>b</sup> Wolfgang Bensch<sup>a</sup>

<sup>a</sup> Institute for Inorganic Chemistry, University of Kiel, Max-Eyth-Str. 2, 24118 Kiel, Germany

<sup>b</sup> Institute for Materials Science, University of Kiel, Kaiserstr. 2, 24143 Kiel, Germany

<sup>c</sup> Institute of Physics, RWTH Aachen University, Sommerfeldstr. 14, 52056 Aachen, Germany

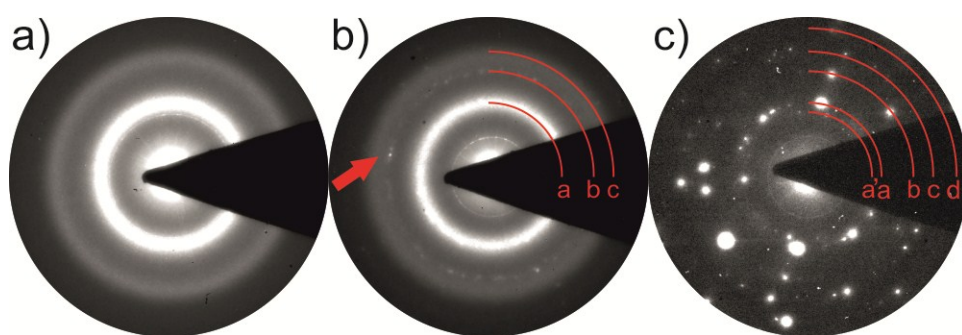

Fig. S1  $\text{Ge}_2\text{Sb}_2\text{Te}_5$  ED: a) at room temperature; b) crystallization starts at 132 °C; c) electron diffraction at 150 °C. The red arrow marks first visible diffraction spots.

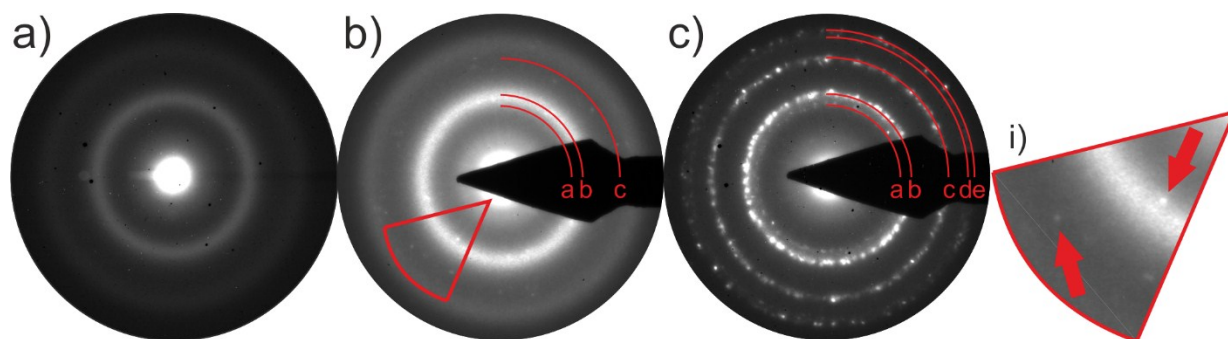

Fig. S2  $\text{Ge}_2\text{Sb}_2\text{Te}_4\text{Se}$  ED: a) at room temperature; b) at 160 °C c) at 190 °C. The red arrow marks first visible diffraction spots. Further the red curves show the rotational average of the respective electron diffraction pattern.

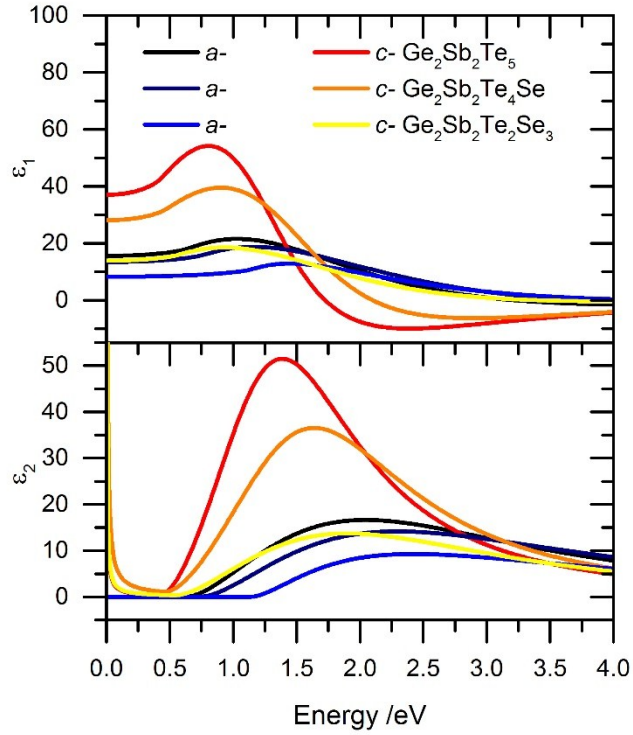

Fig. S3 Functions of  $\epsilon_1$  and  $\epsilon_2$  including the Drude term.

Table S1 d-values of  $\text{Ge}_2\text{Sb}_2\text{Te}_5$  according to the caption in Figure S1.

|      | d-value / $\text{\AA}$ | plane |
|------|------------------------|-------|
| $a'$ | 3.57                   | (111) |
| $a$  | 2.96                   | (002) |
| $b$  | 2.11                   | (022) |
| $c$  | 1.75                   | (222) |
| $d$  | 1.51                   | (004) |

Table S2 d-values of  $\text{Ge}_2\text{Sb}_2\text{Te}_4\text{Se}$  according to the caption in Figure S2.

|     | d-value / $\text{\AA}$ | plane  |
|-----|------------------------|--------|
| $a$ | 3.43                   | (003)  |
| $b$ | 3.05                   | (012)  |
| $c$ | 2.14                   | (-114) |
| $d$ | 1.79                   | (006)  |
| $e$ | 1.73                   | (-222) |

**Table S3** d-values of  $\text{Ge}_2\text{Sb}_2\text{Te}_2\text{Se}_3$  according to the caption in Figure 3.

|      | d-value /Å | plane  |
|------|------------|--------|
| $a'$ | 3.44       | (003)  |
| $a$  | 3.01       | (012)  |
| $b$  | 2.09       | (-114) |
| $c$  | 1.78       | (006)  |
| $d$  | 1.69       | (-222) |
| $e$  | 1.48       | (024)  |

**Table S4** Rhombohedral setting.

| rhombohedral setting                           | $a$ / Å | $\alpha$ /° |
|------------------------------------------------|---------|-------------|
| $\text{Ge}_2\text{Sb}_2\text{Te}_4\text{Se}_1$ | 4.2404  | 59.34       |
| $\text{Ge}_2\text{Sb}_2\text{Te}_2\text{Se}_3$ | 4.2156  | 58.57       |
